# Supplementary material
Source: PubMed Central journal article supplement (PMC5030147)

## Supplementary Information

for

### Discovery of LRE1 as a specific and allosteric inhibitor of soluble adenylyl cyclase

Lavoisier Ramos-Espiritu<sup>1,5</sup>, Silke Kleinboelting<sup>2</sup>, Felipe A. Navarrete<sup>3</sup>, Antonio Alvau<sup>3</sup>, Pablo E. Visconti<sup>3</sup>, Federica Valsecchi<sup>4</sup>, Anatoly Starkov<sup>4</sup>, Giovanni Manfredi<sup>4</sup>, Hannes Buck<sup>1,6</sup>, Carolina Adura<sup>5</sup>, Jonathan H. Zippin<sup>6</sup>, Joop van den Heuvel<sup>7</sup>, J. Fraser Glickman<sup>5</sup>, Clemens Steegborn<sup>2</sup>, Lonny R. Levin<sup>1</sup>, Jochen Buck<sup>1</sup>

<sup>1</sup>Department of Pharmacology, Weill Cornell Medical College, New York, NY 10065, USA.

<sup>2</sup>Department of Biochemistry, University of Bayreuth, 95440 Bayreuth, Germany.

<sup>3</sup>Department of Veterinary and Animal Science, University of Massachusetts, Amherst MA, USA

<sup>4</sup>Brain and Mind Research Institute, Weill Cornell Medical College, New York, NY 10065, USA.

<sup>5</sup>The High-Throughput Screening and Spectroscopy Resource Center, The Rockefeller University, New York, NY 10065, USA.

<sup>6</sup>Department of Dermatology, Weill Cornell Medical College, New York, NY 10065, USA.

<sup>7</sup> Helmholtz-Zentrum für Infektionsforschung, 38124 Braunschweig, Germany.

## Supplementary Results

**Supplementary Table 1.** Small molecule screening data.

| Category       | Parameter               | Description                                                                                                                                                                                                                                                                                                                                                                                                                                                                                                                                                                                                                                                                                                                                                                                                                                                                                                                                                                                                                |
|----------------|-------------------------|----------------------------------------------------------------------------------------------------------------------------------------------------------------------------------------------------------------------------------------------------------------------------------------------------------------------------------------------------------------------------------------------------------------------------------------------------------------------------------------------------------------------------------------------------------------------------------------------------------------------------------------------------------------------------------------------------------------------------------------------------------------------------------------------------------------------------------------------------------------------------------------------------------------------------------------------------------------------------------------------------------------------------|
| Assay          | Type of assay           | Purified Enzyme assay                                                                                                                                                                                                                                                                                                                                                                                                                                                                                                                                                                                                                                                                                                                                                                                                                                                                                                                                                                                                      |
|                | Target                  | Soluble adenylyl cyclase                                                                                                                                                                                                                                                                                                                                                                                                                                                                                                                                                                                                                                                                                                                                                                                                                                                                                                                                                                                                   |
|                | Primary measurement     | Mass spectrometry                                                                                                                                                                                                                                                                                                                                                                                                                                                                                                                                                                                                                                                                                                                                                                                                                                                                                                                                                                                                          |
|                | Key reagents            | Human sAC enzyme, ATP, NaHCO <sub>3</sub>                                                                                                                                                                                                                                                                                                                                                                                                                                                                                                                                                                                                                                                                                                                                                                                                                                                                                                                                                                                  |
| Assay protocol |                         | Reactions (40 $\mu$ L) contained 50 mM Tris pH 7.5, 1 mM ATP, 5 mM MgCl <sub>2</sub> , 5 mM CaCl <sub>2</sub> , 40 mM NaHCO <sub>3</sub> , 2 mM DTT and sAC incubated at 37°C for 3 hours and stopped with 40 $\mu$ L of 1%(v/v) formic acid. Samples were analyzed in a Rapid-fire automated Solid phase extraction system coupled to TOF mass spectrometer. Order of addition: 1) reaction buffer (10 $\mu$ L). 2) compounds (80 nL) 3) sAC enzyme solution (5 $\mu$ L) 4) 20 $\mu$ L reaction buffer. 5) Reactions were started with the further addition of 5 $\mu$ L ATP in reaction buffer then stopped after 3 hours. 6) stop solution (40 $\mu$ L of 1% formic acid).                                                                                                                                                                                                                                                                                                                                              |
|                | Additional comments     | Sample Analysis, Column washing and elution: 35 $\mu$ L of sample was aspirated from each well of the 384-well polypropylene microplate and then injected onto a graphitized carbon SPE column extraction cartridge, washing with 5 mM ammonium acetate, pH 10 and eluting it in 25% acetonitrile, 25% acetone in 5 mM ammonium acetate, pH 10, onto the electrospray-MS, where the mass spectra of each sample were collected. The RapidFire sipper was washed between sample injections using organic (25% acetonitrile, 25% acetone in 5 mM ammonium acetate, pH 10) and then aqueous (5 mM ammonium acetate, pH 10) solvents.                                                                                                                                                                                                                                                                                                                                                                                          |
| Library        | Library size            | 33,135 pure compounds                                                                                                                                                                                                                                                                                                                                                                                                                                                                                                                                                                                                                                                                                                                                                                                                                                                                                                                                                                                                      |
|                | Library composition     | Low molecular weight compounds were selected for drug-likeness scores and diversity from a larger collection of 1 million compounds.                                                                                                                                                                                                                                                                                                                                                                                                                                                                                                                                                                                                                                                                                                                                                                                                                                                                                       |
|                | Source                  | Enamine                                                                                                                                                                                                                                                                                                                                                                                                                                                                                                                                                                                                                                                                                                                                                                                                                                                                                                                                                                                                                    |
|                | Additional comments     | Pipeline pilot software (Biovia inc.) was used to execute a published algorithm for scoring compounds based on drug-likeness, called the quantitative exponent of drug-likeness (Q.E.D.) score <sup>84</sup> . From the 7.87 million commercially available compounds, 3.05 million compounds had a weighted Q.E.D. score greater than 0.7. The "choose diverse" component of the pipeline pilot software utilizes ECFP6 fingerprint descriptors to cluster the compounds into structurally related groups and chooses a single representative of each cluster, based on Tanimoto distances, called "cluster centers". The "choose diverse" component identified the 100,000 most structurally diverse compounds from among these 3.05 million structures. From these 100,000 "cluster centers," 33,135 could be purchased from Enamine in 1 mg quantities at a price which was within our budgetary limits. These compounds were formatted in 10 copies of 5 mM DMSO stocks, frozen at -20C in 384-well deep well plates. |
| Screen         | Format                  | 384-well plate V bottom                                                                                                                                                                                                                                                                                                                                                                                                                                                                                                                                                                                                                                                                                                                                                                                                                                                                                                                                                                                                    |
|                | Concentration(s) tested | 10 $\mu$ M; 0.2%DMSO                                                                                                                                                                                                                                                                                                                                                                                                                                                                                                                                                                                                                                                                                                                                                                                                                                                                                                                                                                                                       |

|                                          |                                                                                                                                                                                                                                                                                                                           |
|------------------------------------------|---------------------------------------------------------------------------------------------------------------------------------------------------------------------------------------------------------------------------------------------------------------------------------------------------------------------------|
| Plate controls                           | DMSO (negative control), denatured enzyme control (positive control)                                                                                                                                                                                                                                                      |
| Reagent/ compound dispensing system      | Multidrop Combi with RapidStack (Thermo Scientific) for reagents; Janus Automated Workstation with nanohead (Perkin-Elmer) for compounds                                                                                                                                                                                  |
| Detection instrument and software        | RapidFire Mass Spectroscopy (Agilent); Agilent MassHunter Workstation Software                                                                                                                                                                                                                                            |
| Assay validation/QC                      | Hit compounds were re-picked from the original 5mM source plates and retested at 7 serially diluted concentrations; in triplicate and a concentration-response curve fitted to a 4 parameter hyperbolic using CDD software. HPLC-MS performed on all hit compounds to detect at least 90% purity from the primary sample. |
| Correction factors                       | none                                                                                                                                                                                                                                                                                                                      |
| Normalization                            | Normalized within each assay plate: Percent inhibition (%NPI): $[(\chi - \mu_-) / (\mu_+ - \mu_-)] \times 100\%$ ; where $\chi$ is the sample; $\mu_-$ mean of negative control and $\mu_+$ mean of the positive control                                                                                                  |
| Additional comments                      |                                                                                                                                                                                                                                                                                                                           |
| Post-HTS analysis                        |                                                                                                                                                                                                                                                                                                                           |
| Hit criteria                             | Normalized Percentage Inhibition $\geq 35\%$                                                                                                                                                                                                                                                                              |
| Hit rate                                 | 0.139%                                                                                                                                                                                                                                                                                                                    |
| Additional assay(s)                      | ELISA based detection of enzyme mediated cAMP formation                                                                                                                                                                                                                                                                   |
| Confirmation of hit purity and structure | LC-MS; powders reordered and independently synthesized and re-tested.                                                                                                                                                                                                                                                     |
| Additional comments                      | All hit compounds reported were at least 95% pure by LC-MS.                                                                                                                                                                                                                                                               |

**Supplementary Table 2.** Small molecule screen validated hits.

| Molecule Name<br>(Q.E.D. score)      | Structure                                                                           | Molecular Weight<br>(g/mol) | Primary Screen<br>% NPI | RF-MSS Assay<br>IC <sub>50</sub> (μM) | EIA Assay<br>IC <sub>50</sub> (μM) |
|--------------------------------------|-------------------------------------------------------------------------------------|-----------------------------|-------------------------|---------------------------------------|------------------------------------|
| RU-0204277<br><b>LRE1</b><br>(0.872) | 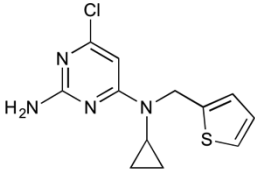   | 280.8                       | 57.0                    | 3.3                                   | 6.3                                |
| RU-0207148<br>(0.752)                |    | 429.7                       | 67.6                    | 5.7                                   | 4.4                                |
| RU-0207328<br>(0.534)                |    | 240.7                       | 58.1                    | > 20                                  | > 20                               |
| RU-0206544<br>(0.707)                |   | 350.4                       | 50.0                    | > 20                                  | > 20                               |
| KH7                                  |  | 419.3                       | -                       | -                                     | 8.0 [Ref:27]                       |

**Supplementary Table 3.** Crystallography data.

|                                                   | sAC/LRE1                            | sAC/ApCpp/LRE1         |
|---------------------------------------------------|-------------------------------------|------------------------|
| <b>Data collection</b>                            |                                     |                        |
| Space group                                       | $P6_3$                              | $P6_3$                 |
| Cell dimensions                                   |                                     |                        |
| $a, b, c$ (Å)                                     | 99.3, 99.3, 99.4                    | 100.0, 100.0, 98.7     |
| Resolution (Å)                                    | 44.42–1.79 (1.90–1.79) <sup>1</sup> | 44.61–1.86 (1.98–1.86) |
| $R_{meas}$ <sup>2</sup>                           | 11.5 (119.2)                        | 12.2 (128.1)           |
| $I / \sigma I$                                    | 16.3 (2.1)                          | 10.2 (1.3)             |
| Completeness (%)                                  | 99.9 (99.5)                         | 99.9 (99.7)            |
| Redundancy                                        | 11.4 (11.2)                         | 4.6 (4.4)              |
| <b>Refinement</b>                                 |                                     |                        |
| Resolution (Å)                                    | 44.42–1.79                          | 44.61–1.86             |
| Unique reflections                                | 49,787                              | 44,694                 |
| $R_{work}$ <sup>3</sup> / $R_{free}$ <sup>4</sup> | 16.2 / 20.6                         | 17.8 / 22.3            |
| No. atoms                                         | 4165                                | 4005                   |
| protein                                           | 3730                                | 3650                   |
| ligand <sup>5</sup>                               | 18                                  | 50                     |
| solvent <sup>6</sup>                              | 417                                 | 305                    |
| $B$ factors                                       | 30.7                                | 35.5                   |
| protein                                           | 30.5                                | 34.9                   |
| ligand                                            | 20.7                                | 40.3                   |
| solvent                                           | 41.6                                | 41.0                   |
| r.m.s. deviations                                 |                                     |                        |
| Bond lengths (Å)                                  | 0.019                               | 0.019                  |
| Bond angles (°)                                   | 2.08                                | 2.03                   |

<sup>1</sup>Values in parentheses are for highest-resolution shell.

<sup>2</sup> $R_{meas} = \frac{\sum_h \sqrt{\frac{n}{n-1}} \sum |I| - I}{\sum_h \sum I}$ ;  $I$  is the intensity of an individual measurement,  $\langle I \rangle$  the corresponding mean value, and  $h$  and  $n$  are the indices and redundancies of the reflections.

<sup>3</sup>R-factor =  $R = \frac{\sum_{hkl} ||F_{obs}| - k|F_{calc}||}{\sum_{hkl} |F_{obs}|}$ ;  $|F_{obs}|$  is the observed and  $|F_{calc}|$  the calculated structure factor amplitude.

<sup>4</sup> $R_{free}$  was calculated from 5 % of measured reflections omitted from refinement.

<sup>5</sup>Ligand = inhibitor or inhibitor + substrate analog +  $Ca^{2+}$

<sup>6</sup>Solvent comprises water and other solvent molecules

# Supplementary Figure 1

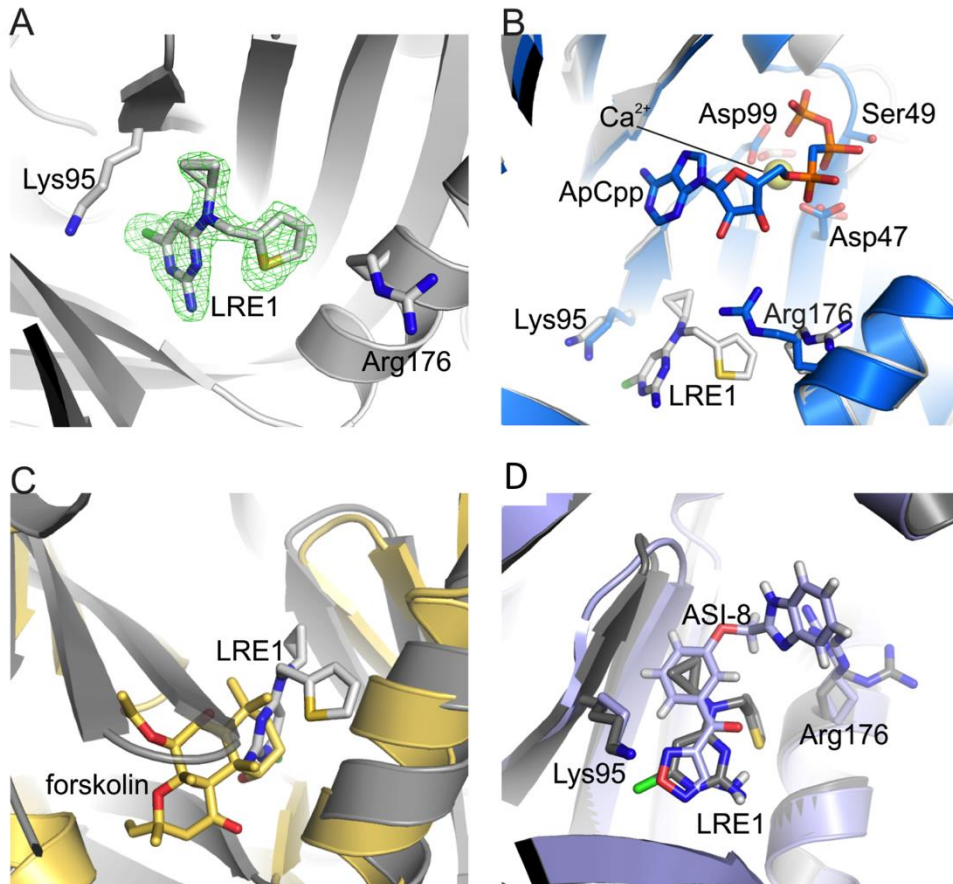

**Supplementary Figure 1: Structural analysis of sAC inhibition by LRE1 and comparison to other AC modulators.** **(a)** Close-up of the BBS of the sAC/LRE1 complex. Ligand and key interacting residues are shown as sticks colored according to atom type. LRE1 is overlaid with  $F_o - F_c$  omit electron density (blue) contoured at  $5\sigma$ . **(b)** Overlay of the sAC/LRE1 complex (grey) with a sAC/ApCpp structure (blue). Ligands and interacting residues are shown as sticks (colored according to atom type), and  $Ca^{2+}$  as a yellow sphere. **(c)** Overlay of sAC/LRE1 (grey) with a tmAC/forskolin complex (yellow; RMSD  $9.7 \text{ \AA}^2$  for 238  $C_\alpha$  atoms). The ligands are shown as sticks and colored according to atom type. **(d)** Overlay of sAC/LRE1 (grey) with sAC/ASI-8 (blue; RMSD  $0.3 \text{ \AA}^2$  for 366  $C_\alpha$  atoms). Ligands and two key BBS residues are shown as sticks and colored according to atom type.

## Supplementary Figure 2.

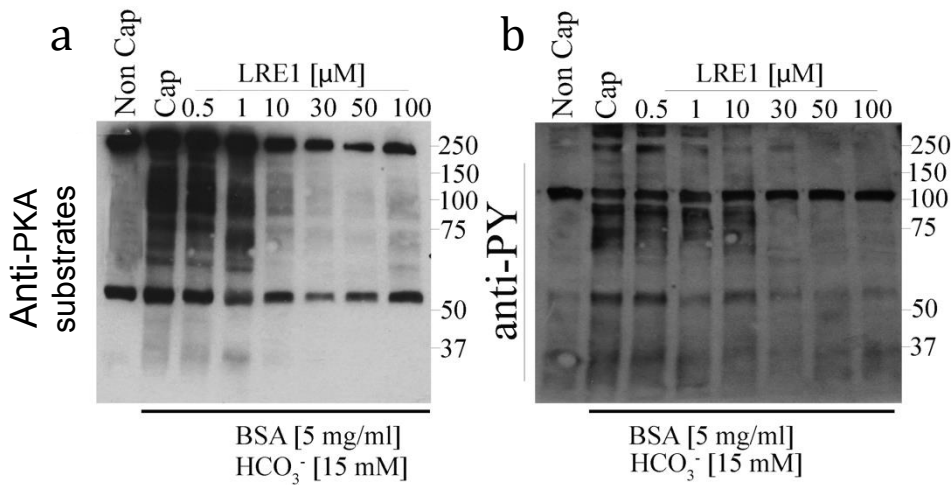

**Supplementary Figure 2: LRE1 inhibits sAC dependent sperm capacitation.** Mouse cauda sperm obtained in media devoid of Ca<sup>2+</sup>, HCO<sub>3</sub><sup>-</sup>, or BSA were activated by incubation in capacitation media containing 15 mM HCO<sub>3</sub><sup>-</sup>, 5 mg/ml BSA, and 0.3 mM EGTA for 60 minutes in the presence of the shown amounts of LRE1. Non Cap = non capacitated negative control. Cap = DMSO treated capacitated positive control. **(a)** Western blot using anti-PKA substrates antibodies. The complete gel is shown in Supplementary Figure 6. **(b)** Western blot using anti-phospho tyrosine antibodies of the same blot as in (a). The complete gel is shown in Supplementary Figure 7. Shown are representative Western blots of experiments repeated three times using independent sperm preparations from different mice. Complete gels used for these images are included below.



Supplementary Figure 3.

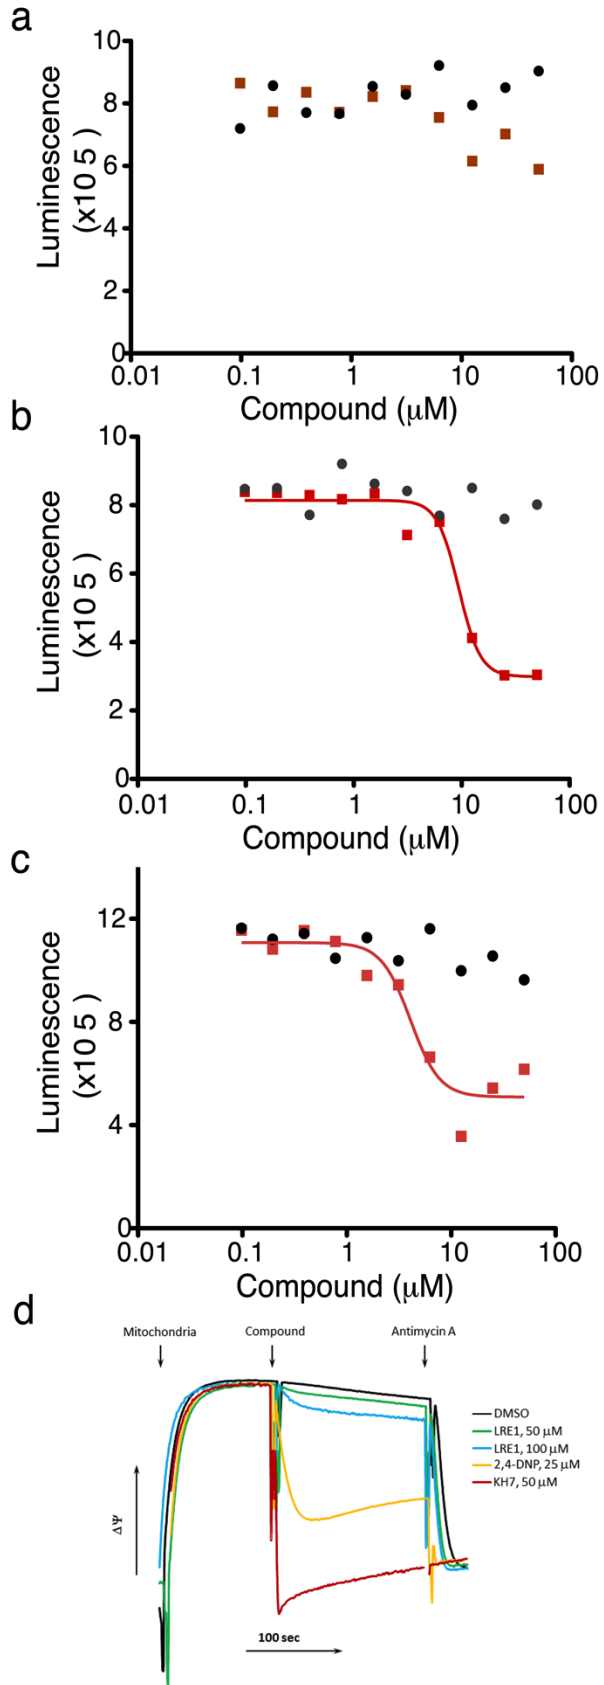

**Supplementary Figure 3: LRE1 is less toxic than KH7.** WT **(a,b)** or sAC KO **(c)** MEFs (1500 cells/well; 384 wells/plate) were grown for 24 **(a)** or 48 hours **(b,c)** in the presence of the indicated concentrations of LRE1 (black circles) or KH7 (red squares). Cell viability, as determined by CellTiter-Glo, is shown as luminescence; values are averages of triplicate determinations  $\pm$  S.E.M. of a representative experiment repeated at least two times. **(d)** Changes in membrane potential ( $\Delta\Psi_m$ ) in mouse brain mitochondria (at 0.2 mg/ml) incubated in 125 mM KCl, 20 mM HEPES pH 7.4, 4 mM  $\text{KH}_2\text{PO}_4$ , 0.5 mM EGTA, 0.2 mg/ml fatty acid free bovine serum albumin, 0.4  $\mu\text{M}$  Safranin O, 5 mM pyruvate, and 2.5 mM malate in the presence of DMSO solvent alone (black line), 50  $\mu\text{M}$  LRE1 (green line), 100  $\mu\text{M}$  LRE1 (cyan line), 50  $\mu\text{M}$  KH7 (red line), or 25  $\mu\text{M}$  of the classical uncoupler 2,4 dinitrophenol (2,4-DNP). Addition of Antimycin A to inhibit the mitochondrial electron transport chain confirms the mitochondrial integrity. Data represent single measurements of a representative experiment repeated at least two times.

Supplementary Figure 4: Complete Gel used for construction of Figure 5a.

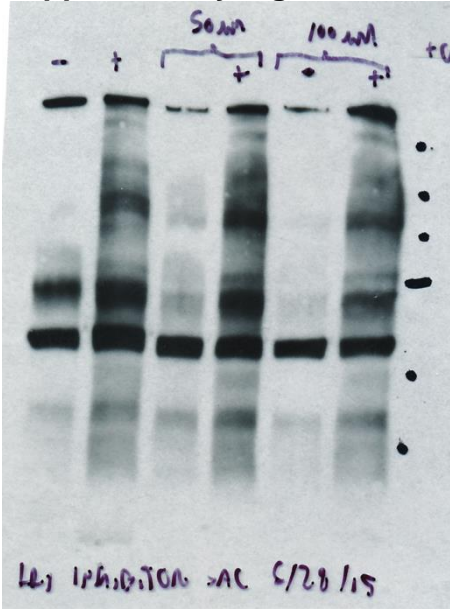

Supplementary Figure 5: Complete Gel used for construction of Figure 5b.

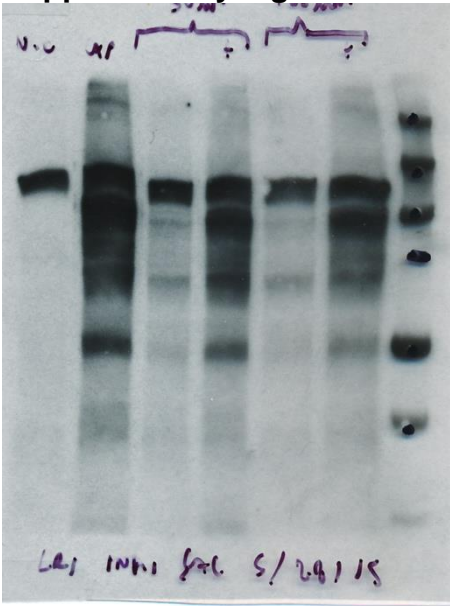

**Supplementary Figure 6:** Complete Gel used for construction of Supplementary Figure 2a.

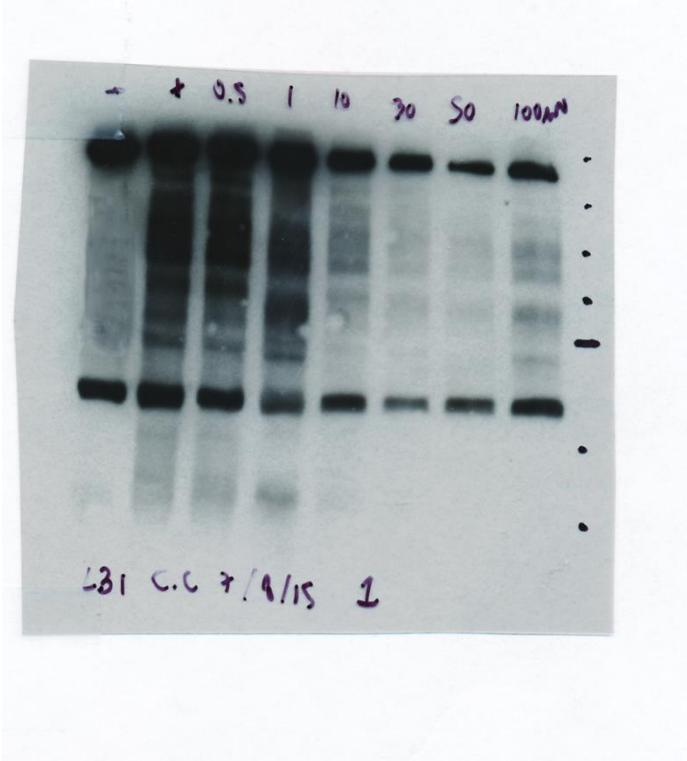

**Supplementary Figure 7:** Complete Gel used for construction of Supplementary Figure 2b.

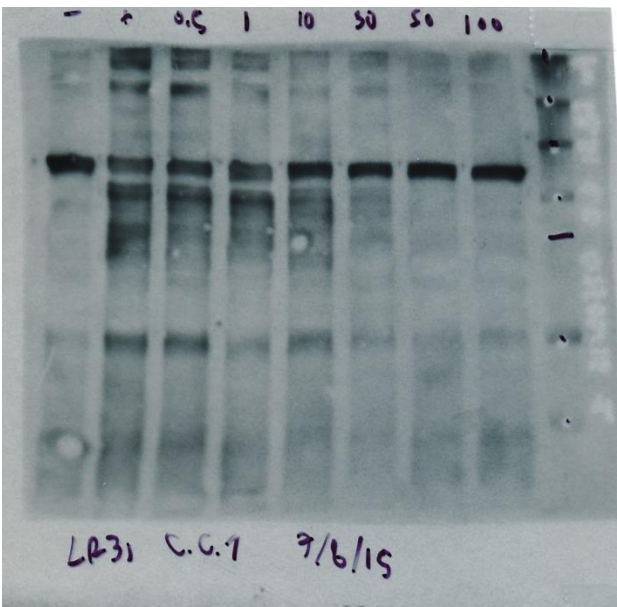

## Supplementary Figure 8: LC/MS Validation of LRE1 structure

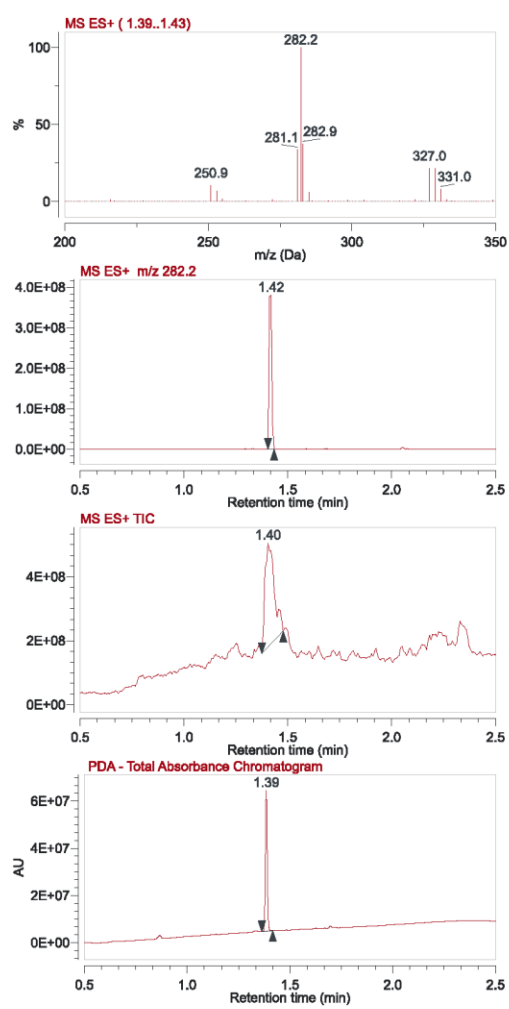

## Supplementary Figure 9: NMR Validation of LRE1 structure

<sup>1</sup>H NMR (500 MHz, DMSO-*d*<sub>6</sub>) δ 7.36 (d, *J* = 5.0 Hz, 1H), 7.01 (d, *J* = 3.3 Hz, 1H), 6.95 (dd, *J* = 5.1, 3.3 Hz, 1H), 6.60 (brs, 2H), 6.18 (s, 1H), 4.91 (s, 2H), 2.42 (tt, *J* = 6.9, 3.8 Hz, 1H), 0.90 – 0.85 (m, 2H), 0.73 – 0.69 (m, 2H).

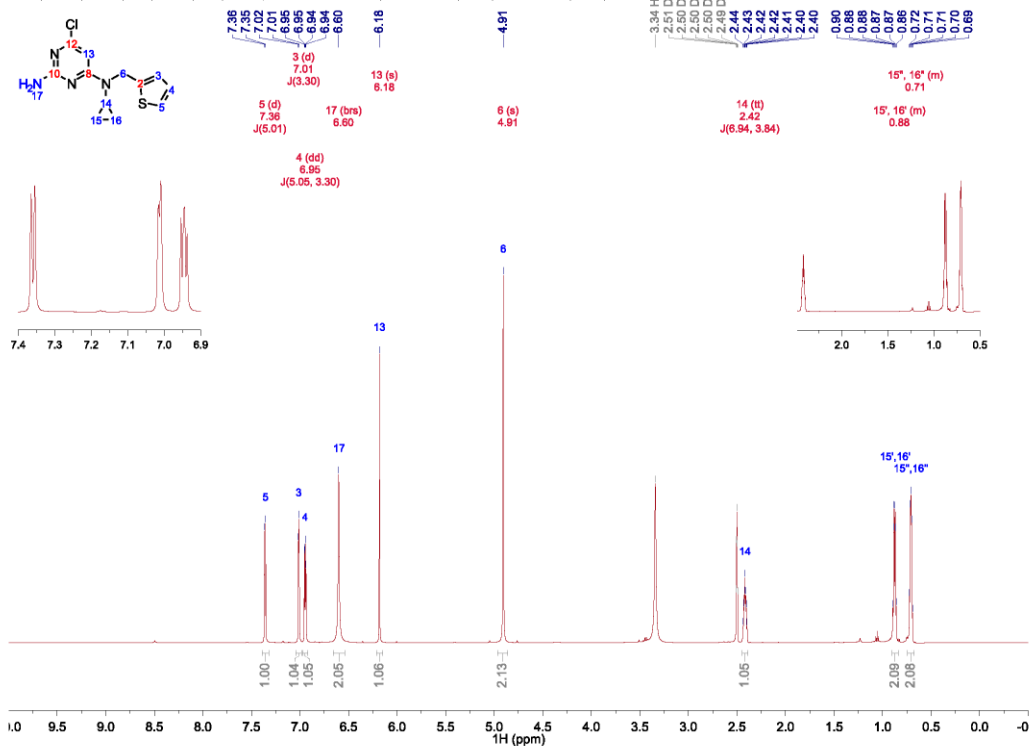

<sup>1</sup>H NMR (500 MHz, DMSO-*d*<sub>6</sub>) δ 7.36 (d, *J* = 5.0 Hz, 1H), 7.01 (d, *J* = 3.3 Hz, 1H), 6.95 (dd, *J* = 5.1, 3.3 Hz, 1H), 6.60 (brs, 2H), 6.18 (s, 1H), 4.91 (s, 2H), 2.42 (tt, *J* = 6.9, 3.8 Hz, 1H), 0.90 – 0.85 (m, 2H), 0.73 – 0.69 (m, 2H).

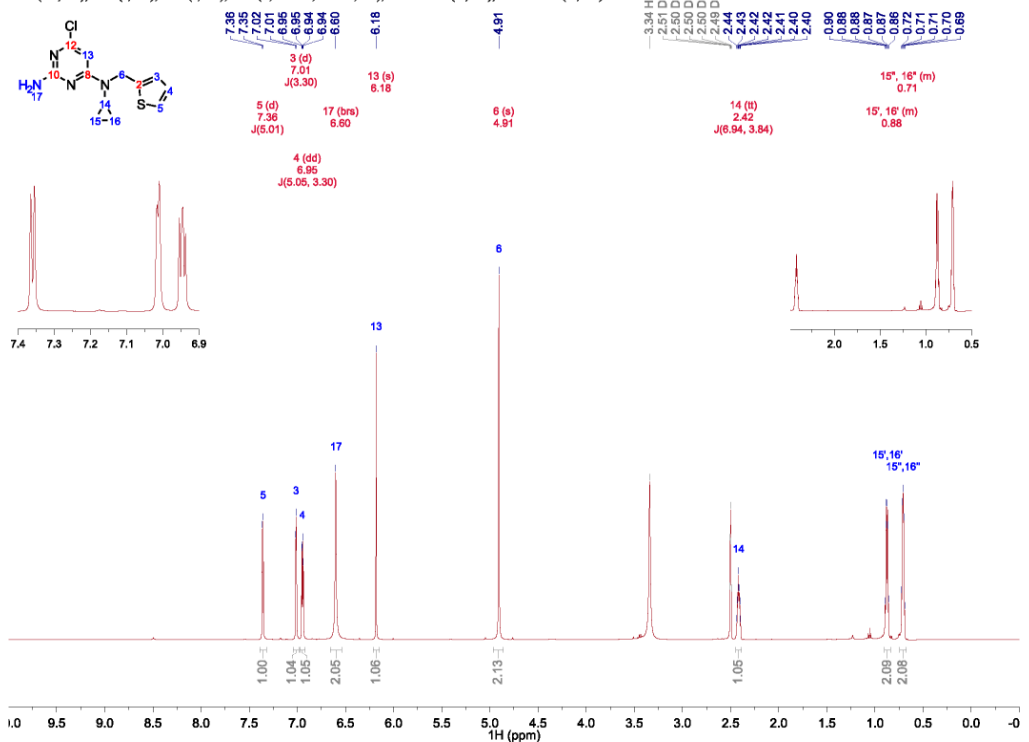

Supplement: NIHMS789743-supplement-1.pdf [file NIHMS789743-supplement-1.pdf]
